# Supplementary material
Source: publisher figshare collection journal article supplement (https://asha.figshare.com/articles/dataset/_/22044632)
Supplement: Supplementary file 1 [file 1]

**Supplemental Material S1.** Numerical results of linear mixed effects models.

| Model  | Condition             | Complexity        | MSD group   | Difference from controls | <i>p</i> value |
|--------|-----------------------|-------------------|-------------|--------------------------|----------------|
| Ratios | Natural-to-fast ratio | Lower complexity  | Hypokinetic | −.177                    | .213           |
|        |                       |                   | Phonetic    | −.179                    | .257           |
|        |                       |                   | Prosodic    | −.556                    | < .001         |
|        |                       |                   | Spastic     | −.530                    | .023           |
|        |                       | Higher complexity | Hypokinetic | .003                     | .982           |
|        |                       |                   | Phonetic    | .005                     | .977           |
|        |                       |                   | Prosodic    | −.215                    | .118           |
|        |                       |                   | Spastic     | −.099                    | .682           |
|        | Slow-to-natural ratio | Lower complexity  | Hypokinetic | −.223                    | .118           |
|        |                       |                   | Phonetic    | .192                     | .251           |
|        |                       |                   | Prosodic    | −.313                    | .023           |
|        |                       |                   | Spastic     | −.514                    | .028           |
|        |                       | Higher complexity | Hypokinetic | .275                     | .058           |
|        |                       |                   | Phonetic    | −.102                    | .557           |
|        |                       |                   | Prosodic    | −.248                    | .070           |
|        |                       |                   | Spastic     | −.432                    | .063           |
| Pauses | Fast                  | Lower complexity  | Hypokinetic | .035                     | .715           |
|        |                       |                   | Phonetic    | .064                     | .564           |
|        |                       |                   | Prosodic    | .145                     | .118           |
|        |                       |                   | Spastic     | −.041                    | .821           |
|        |                       | Higher complexity | Hypokinetic | .008                     | .936           |
|        |                       |                   | Phonetic    | .109                     | .333           |
|        |                       |                   | Prosodic    | .274                     | .004           |
|        |                       |                   | Spastic     | .072                     | .658           |
|        | Natural               | Lower complexity  | Hypokinetic | −.017                    | .841           |
|        |                       |                   | Phonetic    | .064                     | .569           |
|        |                       |                   | Prosodic    | .122                     | .200           |
|        |                       |                   | Spastic     | −.022                    | .904           |
|        |                       | Higher complexity | Hypokinetic | .113                     | .296           |
|        |                       |                   | Phonetic    | .242                     | .031           |
|        |                       |                   | Prosodic    | .389                     | < .001         |
|        |                       |                   | Spastic     | .002                     | .994           |
|        | Slow                  | Lower complexity  | Hypokinetic | .048                     | .579           |
|        |                       |                   | Phonetic    | .096                     | .398           |
|        |                       |                   | Prosodic    | .197                     | .027           |
|        |                       |                   | Spastic     | .227                     | .163           |
|        |                       | Higher complexity | Hypokinetic | .033                     | .738           |
|        |                       |                   | Phonetic    | −.008                    | .955           |
|        |                       |                   | Prosodic    | .252                     | .002           |
|        |                       |                   | Spastic     | .167                     | .315           |

Note. MSD = motor speech disorder.
