# Supplementary material
Source: publisher figshare collection journal article supplement (https://asha.figshare.com/articles/dataset/_/22044632)
Supplement: Supplementary file 2 [file 1]

**Supplemental Material S2.** The fastest and slowest durations for each group.

| Variable              | Control ( <i>n</i> = 9) | Phonetic ( <i>n</i> = 4) | Prosodic ( <i>n</i> = 8) | Spastic ( <i>n</i> = 2) | Hypokinetic ( <i>n</i> = 6) | Total ( <i>N</i> = 29) |
|-----------------------|-------------------------|--------------------------|--------------------------|-------------------------|-----------------------------|------------------------|
| <i><b>Fastest</b></i> |                         |                          |                          |                         |                             |                        |
| Cat                   | 0.18 (0.16, 0.22)       | 0.25 (0.22, 0.26)        | 0.34 (0.24, 0.38)        | 0.37 (0.37, 0.37)       | 0.24 (0.22, 0.24)           | 0.24 (0.21, 0.33)      |
| Catnip                | 0.38 (0.35, 0.49)       | 0.49 (0.40, 0.60)        | 0.68 (0.58, 0.76)        | 0.79 (0.75, 0.83)       | 0.41 (0.39, 0.45)           | 0.51 (0.39, 0.67)      |
| Catastrophe           | 0.62 (0.57, 0.75)       | 0.96 (0.68, 1.27)        | 1.31 (1.13, 1.44)        | 1.50 (1.45, 1.54)       | 0.68 (0.66, 0.70)           | 0.79 (0.65, 1.29)      |
| Stethoscope           | 0.70 (0.66, 0.75)       | 0.92 (0.76, 1.09)        | 1.16 (1.11, 1.38)        | 1.36 (1.27, 1.45)       | 0.69 (0.60, 0.80)           | 0.89 (0.69, 1.15)      |
| <i><b>Slowest</b></i> |                         |                          |                          |                         |                             |                        |
| Cat                   | 0.88 (0.79, 1.06)       | 1.02 (0.86, 1.17)        | 0.83 (0.73, 1.11)        | 1.07 (0.99, 1.15)       | 0.77 (0.64, 0.91)           | 0.89 (0.72, 1.15)      |
| Catnip                | 1.10 (1.00, 1.18)       | 1.45 (1.15, 1.79)        | 1.41 (0.97, 1.56)        | 1.40 (1.23, 1.56)       | 0.85 (0.80, 1.05)           | 1.11 (0.91, 1.50)      |
| Catastrophe           | 1.39 (1.19, 1.52)       | 1.73 (1.48, 2.09)        | 1.98 (1.68, 2.61)        | 2.17 (2.04, 2.30)       | 1.66 (1.25, 2.28)           | 1.71 (1.33, 2.16)      |
| Stethoscope           | 1.41 (1.14, 1.56)       | 1.56 (1.31, 2.18)        | 2.12 (1.67, 2.29)        | 1.88 (1.85, 1.90)       | 1.53 (1.11, 1.69)           | 1.60 (1.41, 2.00)      |
